# Supplementary material
Source: PubMed Central journal article supplement (PMC2277205)
Supplement: jphysiol_2007.129601_1.pdf [file jphysiol_2007.129601_1.pdf]

## Supplemental Material

**SM-Table 1. Conditions for the RT-PCR survey of Cl<sup>-</sup> transporters and positive control genes**

| Name                           | Expected Product size (bp) | Primer Sequence              | Annealing Temp. (°C) | Reference or Accession number                               |
|--------------------------------|----------------------------|------------------------------|----------------------|-------------------------------------------------------------|
| <i>Slc4a1</i><br><i>kAE1</i>   | 512                        | 5'GCTGGTGGCTTAGCTAAGCAG      | 70                   | Sahr <i>et al.</i> 1996;<br>Papageorgiou <i>et al.</i> 2001 |
|                                |                            | 5'CAGCGATGGCTGGTGAGGAAG      |                      |                                                             |
| <i>Slc4a1</i><br><i>eAE1</i>   | 533                        | 5'GAGACCTAACCATCCCTGTGAC     | 61                   | Papageorgiou <i>et al.</i> 2001                             |
|                                |                            | 5'CAGCGATGGCTGGTGAGGAAG      |                      |                                                             |
| <i>Slc4a2</i><br><i>AE2</i>    | 569                        | 5'TCTCGACCTGTTGCTCATTG       | 61                   | Lecanda <i>et al.</i> 2000;<br>NM_009207                    |
|                                |                            | 5'GCTCTGCCTCATTAGCATCC       |                      |                                                             |
| <i>Slc4a3</i><br><i>AE3</i>    | 570                        | 5'CTCGTGGTAGGCTTCTCTGG       | 61                   | Alper <i>et al.</i> 2002;<br>NM_009208                      |
|                                |                            | 5'CACCGTCAGCTTCTGTGTGT       |                      |                                                             |
| <i>Slc4a9</i><br><i>AE4</i>    | 515                        | 5'TGGTGGTGTTCGTCCTTACA       | 64                   | NM_172830                                                   |
|                                |                            | 5'TGACGCCAGCTAATTCACAG       |                      |                                                             |
| <i>Slc4a10</i><br><i>NCBE</i>  | 345                        | 5'CACTGGAGGGACACTACAGAGAC    | 61                   | NM_033552                                                   |
|                                |                            | 5'GGATGGGAGAGAGGGTTTACAA     |                      |                                                             |
| <i>Slc12a1</i><br><i>NKCC2</i> | 152                        | 5'GGAAGGCTTCTTCTCGGTCT       | 61                   | Mount <i>et al.</i> 1999;<br>NM_183354                      |
|                                |                            | 5'CTATGTAGGCCACGGTGGTG       |                      |                                                             |
| <i>Slc12a2</i><br><i>NKCC1</i> | 516                        | 5'GGAAGCAAAGGCTCAGATTG       | 58                   | Randall <i>et al.</i> 1997;<br>NM_009194                    |
|                                |                            | 5'AAGGGTGCAAATCCTGACAC       |                      |                                                             |
| <i>Slc12a3</i><br><i>NCC</i>   | 521                        | 5'CCATGGGGACATTTTTGTTT       | 58                   | NM_019415                                                   |
|                                |                            | 5'AGCCAATCAGAGGGTACAGC       |                      |                                                             |
| <i>Slc12a4</i><br><i>KCC1</i>  | 597                        | 5'TAGGGGCCATTGAGATCTTG       | 61                   | NM_009195                                                   |
|                                |                            | 5'CGATGTCAGCCACCACATAC       |                      |                                                             |
| <i>Slc12a5</i><br><i>KCC2</i>  | 512                        | 5'ATAGCCTCCCTGGATGAGGT       | 61                   | NM_020333                                                   |
|                                |                            | 5'TGTGGATGGTTGTCCAGAAA       |                      |                                                             |
| <i>Slc12a6</i><br><i>KCC3</i>  | 554                        | 5'ACACTTCCCGGTCTGTATGC       | 58                   | Mercado <i>et al.</i> 2005;<br>NM_133648                    |
|                                |                            | 5'CAGCATCCCCAAATTTGTCT       |                      |                                                             |
| <i>Slc12a7</i><br><i>KCC4</i>  | 484                        | 5'CACTGCATCCCATAACCACAG      | 58                   | NM_011390                                                   |
|                                |                            | 5'CCAGAGCAGTGGCTATCACA       |                      |                                                             |
| <i>Slc12a8</i><br><i>CCC9</i>  | 591                        | 5'TCATCTTTGCCTTCCTGCTT       | 64                   | NM_134251<br>NM_001083902                                   |
|                                |                            | 5'GCTGACGACTCTCCAGTTCC       |                      |                                                             |
| <i>Slc12a9</i><br><i>CIP1</i>  | 589                        | 5'CTGAGTCTGGAGTGGGCTTC       | 58                   | NM_031406                                                   |
|                                |                            | 5'CGTAAAAACCGAGCACCAAT       |                      |                                                             |
| <i>Slc26a3</i><br><i>DRA</i>   | 497                        | 5'AAGAATTATGCCGAAGTGTATGAGCC | 64                   | NM_021353                                                   |
|                                |                            | 5'TCATCATCGGTTCCACAATATATACG |                      |                                                             |

|                                  |     |                        |    |                                      |
|----------------------------------|-----|------------------------|----|--------------------------------------|
| <i>Slc26a4</i><br><i>pendrin</i> | 585 | 5'TGGCTTACGCTATTGCAGTG | 58 | NM_011867                            |
|                                  |     | 5'TGGGACTGGAAAATCTCAGG |    |                                      |
| <i>Slc26a6</i><br><i>PAT1</i>    | 469 | 5'ATCACCACAGGGCTCATACC | 61 | Xie <i>et al.</i> 2002;<br>NM_134420 |
|                                  |     | 5'CAAAGGTCACCAGCCAGATT |    |                                      |
| <i>Slc26a7</i><br><i>SUT2</i>    | 593 | 5'AGCTGGTCATGTTTGTGCTG | 58 | NM_145947                            |
|                                  |     | 5'AAATGAAGGGATCACGTTGC |    |                                      |
| <i>Slc26a8</i><br><i>TAT1</i>    | 577 | 5'CAAGGACTGGCTTCTTGGAG | 64 | NM_146076                            |
|                                  |     | 5'GCTGGTAGAGTTCGCTTTGG |    |                                      |
| <i>Slc26a9</i>                   | 521 | 5'ATCCACTTCCCCATCCCTAC | 62 | NM_177243                            |
|                                  |     | 5'TAGGGGTCAGTGAGCTGCTT |    |                                      |
| <i>Slc26a11</i>                  | 587 | 5'CTGTCACAACAGCTCGCAAT | 64 | NM_178743                            |
|                                  |     | 5'TGGTAGCAGATCCAGCCTCT |    |                                      |
| <i>ZIC2</i>                      | 556 | 5'TTCCCTAGCCCACTTTCCTT | 61 | NM_009574                            |
|                                  |     | 5'AACGGCACAACGTTTACTCC |    |                                      |
| <i>GKN1</i>                      | 526 | 5'GGACCAAACCAGCCTTTGTA | 61 | NM_025466                            |
|                                  |     | 5'TGCAGGCGTGTGTTCTAGTC |    |                                      |

Conditions for the RT-PCR survey of Cl<sup>-</sup> transporters and positive control genes. The expected size in basepairs (bp), the primer sequences, the annealing temperature, and the reference or NCBI accession number are given for each Cl<sup>-</sup> transporter tested and for the two positive control genes (*ZIC2* and *GKN1*). The references describe the variants.
