# Supplementary material
Source: PubMed Central journal article supplement (PMC2277205)
Supplement: tjp0583-1005-SD1.pdf [file tjp0583-1005-SD1.pdf]

Nickell WT, Kleene NK & Kleene SJ (2007). Mechanisms of neuronal chloride accumulation in intact mouse olfactory epithelium. *J Physiol*

## Supplemental Material

**SM-Table 1. Conditions for the RT-PCR survey of Cl<sup>-</sup> transporters and positive control genes**

| Name                           | Expected Product size (bp) | Primer Sequence           | Annealing Temp. (°C) | Reference or Accession number                               |
|--------------------------------|----------------------------|---------------------------|----------------------|-------------------------------------------------------------|
| <i>Slc4a1</i><br><i>kAE1</i>   | 512                        | 5'GCTGGTGGCTTAGCTAAGCAG   | 70                   | Sahr <i>et al.</i> 1996;<br>Papageorgiou <i>et al.</i> 2001 |
|                                |                            | 5'CAGCGATGGCTGGTGAGGAAG   |                      |                                                             |
| <i>Slc4a1</i><br><i>eAE1</i>   | 533                        | 5'GAGACCTAACCATCCCTGTGAC  | 61                   | Papageorgiou <i>et al.</i> 2001                             |
|                                |                            | 5'CAGCGATGGCTGGTGAGGAAG   |                      |                                                             |
| <i>Slc4a2</i><br><i>AE2</i>    | 569                        | 5'TCTCGACCTGTTGCTCATTG    | 61                   | Lecanda <i>et al.</i> 2000;<br>NM_009207                    |
|                                |                            | 5'GCTCTGCCTCATTAGCATCC    |                      |                                                             |
| <i>Slc4a3</i><br><i>AE3</i>    | 570                        | 5'CTCGTGGTAGGCTTCTCTGG    | 61                   | Alper <i>et al.</i> 2002;<br>NM_009208                      |
|                                |                            | 5'CACCGTCAGCTTCTGTGTGT    |                      |                                                             |
| <i>Slc4a9</i><br><i>AE4</i>    | 515                        | 5'TGGTGGTGTTCGTCCTTACA    | 64                   | NM_172830                                                   |
|                                |                            | 5'TGACGCCAGCTAATTCACAG    |                      |                                                             |
| <i>Slc4a10</i><br><i>NCBE</i>  | 345                        | 5'CACTGGAGGGACACTACAGAGAC | 61                   | NM_033552                                                   |
|                                |                            | 5'GGATGGGAGAGAGGGTTTACAA  |                      |                                                             |
| <i>Slc12a1</i><br><i>NKCC2</i> | 152                        | 5'GGAAGGCTTCTTCTCGGTCT    | 61                   | Mount <i>et al.</i> 1999;<br>NM_183354                      |
|                                |                            | 5'CTATGTAGGCCACGGTGGTG    |                      |                                                             |
| <i>Slc12a2</i><br><i>NKCC1</i> | 516                        | 5'GGAAGCAAAGGCTCAGATTG    | 58                   | Randall <i>et al.</i> 1997;<br>NM_009194                    |
|                                |                            | 5'AAGGGTGCAAATCCTGACAC    |                      |                                                             |
| <i>Slc12a3</i><br><i>NCC</i>   | 521                        | 5'CCATGGGGACATTTTTGTTT    | 58                   | NM_019415                                                   |
|                                |                            | 5'AGCCAATCAGAGGGTACAGC    |                      |                                                             |
| <i>Slc12a4</i><br><i>KCC1</i>  | 597                        | 5'TAGGGGCCATTGAGATCTTG    | 61                   | NM_009195                                                   |
|                                |                            | 5'CGATGTCAGCCACCACATAC    |                      |                                                             |
| <i>Slc12a5</i><br><i>KCC2</i>  | 512                        | 5'ATAGCCTCCCTGGATGAGGT    | 61                   | NM_020333                                                   |
|                                |                            | 5'TGTGGATGTTGTCCAGAAA     |                      |                                                             |
| <i>Slc12a6</i><br><i>KCC3</i>  | 554                        | 5'ACACTTCCCGGTCTGTATGC    | 58                   | Mercado <i>et al.</i> 2005;<br>NM_133648                    |
|                                |                            | 5'CAGCATCCCCAAATTTGTCT    |                      |                                                             |
| <i>Slc12a7</i><br><i>KCC4</i>  | 484                        | 5'CACTGCATCCCATACCACAG    | 58                   | NM_011390                                                   |
|                                |                            | 5'CCAGAGCAGTGGCTATCACA    |                      |                                                             |
| <i>Slc12a8</i><br><i>CCC9</i>  | 591                        | 5'TCATCTTTGCCTTCTGCTT     | 64                   | NM_134251<br>NM_001083902                                   |
|                                |                            | 5'GCTGACGACTCTCCAGTTCC    |                      |                                                             |
| <i>Slc12a9</i><br><i>CIP1</i>  | 589                        | 5'CTGAGTCTGGAGTGGGCTTC    | 58                   | NM_031406                                                   |
|                                |                            | 5'CGTAAAAACCGAGCACCAAT    |                      |                                                             |

|                                  |     |                               |    |                                      |
|----------------------------------|-----|-------------------------------|----|--------------------------------------|
| <i>Slc26a3</i><br><i>DRA</i>     | 497 | 5'AAGAATTATGCCGAAGTGTATGAGCC  | 64 | NM_021353                            |
|                                  |     | 5'TCATCATCGGTTCCCACAATATATACG |    |                                      |
| <i>Slc26a4</i><br><i>pendrin</i> | 585 | 5'TGGCTTACGCTATTGCAGTG        | 58 | NM_011867                            |
|                                  |     | 5'TGGGACTGGAAAATCTCAGG        |    |                                      |
| <i>Slc26a6</i><br><i>PAT1</i>    | 469 | 5'ATCACCACAGGGCTCATACC        | 61 | Xie <i>et al.</i> 2002;<br>NM_134420 |
|                                  |     | 5'CAAAGGTCACCAGCCAGATT        |    |                                      |
| <i>Slc26a7</i><br><i>SUT2</i>    | 593 | 5'AGCTGGTCATGTTTGTGCTG        | 58 | NM_145947                            |
|                                  |     | 5'AAATGAAGGGATCACGTTGC        |    |                                      |
| <i>Slc26a8</i><br><i>TAT1</i>    | 577 | 5'CAAGGACTGGCTTCTTGAG         | 64 | NM_146076                            |
|                                  |     | 5'GCTGGTAGAGTTCGCTTTGG        |    |                                      |
| <i>Slc26a9</i>                   | 521 | 5'ATCCACTTCCCCATCCCTAC        | 62 | NM_177243                            |
|                                  |     | 5'TAGGGGTCAGTGAGCTGCTT        |    |                                      |
| <i>Slc26a11</i>                  | 587 | 5'CTGTCACAACAGCTCGCAAT        | 64 | NM_178743                            |
|                                  |     | 5'TGGTAGCAGATCCAGCCTCT        |    |                                      |
| <i>ZIC2</i>                      | 556 | 5'TTCCCTAGCCCACTTTCCTT        | 61 | NM_009574                            |
|                                  |     | 5'AACGGCACAACGTTTACTCC        |    |                                      |
| <i>GKN1</i>                      | 526 | 5'GGACCAAACCAGCCTTTGTA        | 61 | NM_025466                            |
|                                  |     | 5'TGCAGGCGTGTGTTCTAGTC        |    |                                      |

Conditions for the RT-PCR survey of Cl<sup>-</sup> transporters and positive control genes. The expected size in basepairs (bp), the primer sequences, the annealing temperature, and the reference or NCBI accession number are given for each Cl<sup>-</sup> transporter tested and for the two positive control genes (*ZIC2* and *GKN1*). The references describe the variants.

**References** cited in this table that do not appear in the main article:

- Lecanda J, Urtasun R & Medina JF (2000). Molecular cloning and genomic organization of the mouse AE2 anion exchanger gene. *Biochem Biophys Res Commun* **276**, 117-124.
- Mercado A, Vázquez N, Song L, Cortés R, Enck AH, Welch R, Delpire E, Gamba G & Mount DB (2005). NH<sub>2</sub>-terminal heterogeneity in the KCC3 K<sup>+</sup>-Cl<sup>-</sup> cotransporter. *Am J Physiol Renal Physiol* **289**, F1246-F1261.
- Mount DB, Baekgaard A, Hall AE, Plata C, Xu J, Beier DR, Gamba G & Hebert SC (1999). Isoforms of the Na-K-2Cl cotransporter in murine TAL I. Molecular characterization and intrarenal localization. *Am J Physiol Renal Physiol* **276**, F347-F358.
- Papageorgiou P, Shmukler BE, Stuart-Tilley AK, Jiang L & Alper SL (2001). AE anion exchangers in atrial tumor cells. *Am J Physiol Heart Circ Physiol* **280**, H937-H945.
- Randall J, Thorne T & Delpire E (1997). Partial cloning and characterization of *Slc12a2*: the gene encoding the secretory Na<sup>+</sup>-K<sup>+</sup>-2Cl<sup>-</sup> cotransporter. *Am J Physiol* **273**, C1267-C1277.
- Sahr KE, Daniels BP & Hanspal M (1996). Identification of the proximal erythroid promoter region of the mouse anion exchanger gene. *Blood* **88**, 4500-4509.
- Xie Q, Welch R, Mercado A, Romero MF & Mount DB (2002). Molecular characterization of the murine Slc26a6 anion exchanger: functional comparison with Slc26a1. *Am J Physiol Renal Physiol* **283**, F826-F838.
